# Supplementary material for: Plasmodium falciparum transcription in different clinical presentations of malaria associates with circulation time of infected erythrocytes
Source: PubMed Central journal article supplement (PMC8324851; doi:10.1038/s41467-021-25062-z), 2021-07-30
Supplement: 41467_2021_25062_MOESM1_ESM.pdf [file 41467_2021_25062_MOESM1_ESM.pdf]

# Supplementary Information File

***P. falciparum* transcription in different clinical presentations of malaria associates with circulation time of infected erythrocytes**

Richard Thomson-Luque<sup>1</sup>, Lasse Votborg-Novél<sup>1,2</sup>, Wanangwa Ndovie<sup>3</sup>, Carolina M. Andrade<sup>1</sup>, Moussa Niangaly<sup>2,4</sup>, Charalampos Attipa<sup>3,5</sup>, Nathalia F Lima<sup>1</sup>, Drissa Coulibaly<sup>4</sup>, Didier Doumtabe<sup>4</sup>, Bouréima Guindo<sup>4</sup>, Bourama Tangara<sup>4</sup>, Fayçal Maiga<sup>4</sup>, Abdoulaye Kassoum Kone<sup>4</sup>, Karim Traore<sup>4</sup>, Kassoum Kayentao<sup>4</sup>, Aissata Ongoiba<sup>4</sup>, Safiatou Doumbo<sup>4</sup>, Mahamadou A. Thera<sup>4</sup>, Boubacar Traoré<sup>4</sup>, Karl Seydel<sup>6,7</sup>, Nuno S. Osório<sup>8</sup>, Silvia Portugal<sup>1,2\*</sup>

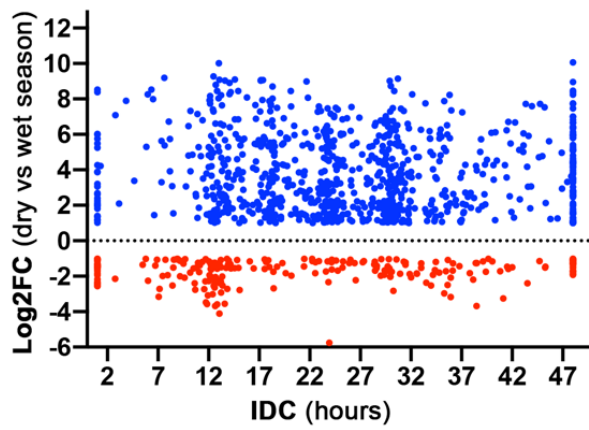

**Supplementary Fig. 1** |  $\text{Log}_2$  expression reported by Andrade et al. of 568 (50.22% of the total 1131) DEGs upregulated in low parasitaemias at the end of the dry season (blue), and 216 (45.38% of the total 476) DEGs upregulated in higher parasitaemias in malaria cases in the wet season (red), shown along the *X* axis according to Bozdech et al. peak timing of transcription.

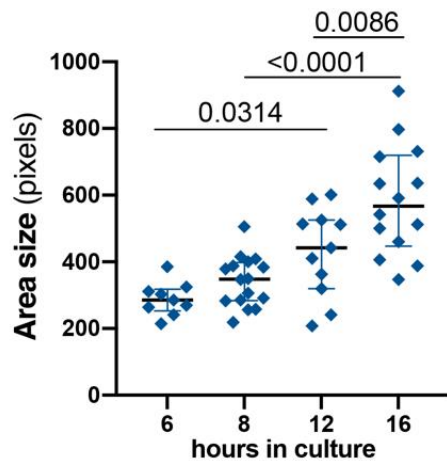

**Supplementary Fig. 2** | 3D7 *P. falciparum* area measured from Giemsa-stained thick smears after 6, 8, 12 and 16 h in culture following merozoite invasion (n= 9, 16, 11 and 14 parasite measured respectively) . Data indicate median  $\pm$  IQR; one-way ANOVA.
